# Supplementary material
Source: PubMed Central journal article supplement (PMC8240030)
Supplement: NIHMS1711196-supplement-2.pdf [file NIHMS1711196-supplement-2.pdf]

**Table 1S.** Summary of individual evidence appraisal

| <b>JH Level</b> | <b>Author, year</b>                              | <b>JH Quality</b> |
|-----------------|--------------------------------------------------|-------------------|
| Level I         | <i>Amin et al, 2011</i> [40]                     | C                 |
| Level II        | <i>Burgess et al, 2019</i> [67]                  | C                 |
|                 | <i>Burns et al, 2019</i> [68]                    | C                 |
|                 | <i>Eakman et al, 2017</i> [39]                   | C                 |
| Level III       | <i>Balba et al, 2018</i> [43]                    | A                 |
|                 | <i>Card et al, 2018</i> [54]                     | B                 |
|                 | <i>Chapman et al, 2006</i> [53]                  | B                 |
|                 | <i>Cunningham &amp; Oehlert, 2018</i> [48]       | B                 |
|                 | <i>Hoot et al, 2018</i> [49]                     | B                 |
|                 | <i>Hughes et al, 2013</i> [50]                   | C                 |
|                 | <i>Jaoude et al, 2016</i> [60]                   | B                 |
|                 | <i>Jaramilo et al, 2016</i> [44]                 | A                 |
|                 | <i>Koffel et al, 2016</i> [45]                   | B                 |
|                 | <i>Koffel, Amundson, &amp; Wisdom, 2019</i> [61] | A                 |
|                 | <i>Koffel et al, 2019</i> [65]                   | A                 |
|                 | <i>Lang et al, 2014</i> [55]                     | B                 |
|                 | <i>Martin et al, 2017</i> [42]                   | B                 |
|                 | <i>Munds, 2017</i> [52]                          | C                 |
|                 | <i>Powel et al, 2015</i> [63]                    | B                 |
|                 | <i>Ruff et al, 2009</i> [59]                     | B                 |
|                 | <i>Ruff et al, 2012</i> [58]                     | C                 |
|                 | <i>Sangani &amp; Baker, 2016</i> [41]            | C                 |
|                 | <i>Taylor et al, 2019</i> [46]                   | C                 |
|                 | <i>Tighe et al, 2020</i> [64]                    | A                 |
|                 | <i>Travaglini et al, 2019</i> [51]               | C                 |
|                 | <i>Weiner et al, 2019</i> [47]                   | C                 |

*Notes.* Johns Hopkins level of evidence (JH Level) where I = RCT or meta-analysis of RCTs, II = quasi-experimental, III = non-experimental, qualitative, meta-synthesis; quality ratings (JH Quality) where A = high, B = good, C = low/major flaws.

**Table 2S.** Sleep disturbances & sleep disorders characteristics

| Citation (year)                                 | Type of Sleep Disorders / Sleep Disturbance  | Sleep Measure(s)                                                                                                                          | Baseline Sleep (mean ± SD); abnormal values per threshold criteria are bolded, when applicable*                                                                                                                                                                                                                                                                                                                                                                                                                         |
|-------------------------------------------------|----------------------------------------------|-------------------------------------------------------------------------------------------------------------------------------------------|-------------------------------------------------------------------------------------------------------------------------------------------------------------------------------------------------------------------------------------------------------------------------------------------------------------------------------------------------------------------------------------------------------------------------------------------------------------------------------------------------------------------------|
| <b>Group 1: Self-reported sleep disturbance</b> |                                              |                                                                                                                                           |                                                                                                                                                                                                                                                                                                                                                                                                                                                                                                                         |
| Balba et al, 2019 [43]                          | Self-reported insomnia symptoms              | ISI, FOSQ-10                                                                                                                              | ISI all subjects: <b>15.11 ± 6.32</b> <sup>†</sup><br>ISI neither group: 13.43 ± 6.08 <sup>†</sup><br>ISI TBI group: 14.51 ± 5.62 <sup>†</sup><br>ISI PTSD group: <b>19.23 ± 5.13</b> <sup>†</sup><br>ISI TBI+PTSD group: <b>19.71 ± 4.34</b> <sup>†</sup><br>FOSQ-10 all subjects: 14.12 ± 3.74 <sup>†</sup><br>FOSQ-10 neither group: 15.40 ± 3.23 <sup>†</sup><br>FOSQ-10 TBI group: 14.57 ± 3.67 <sup>†</sup><br>FOSQ-10 PTSD group: 11.51 ± 3.04 <sup>†</sup><br>FOSQ-10 TBI+PTSD group: 11.47 ± 3.47 <sup>†</sup> |
| Burgess et al, 2019 [67]                        | Self-reported sleep quality and disturbances | PSQI, ISI, wrist actigraphy, and DLMO                                                                                                     | PSQI: <b>7.72 ± 5.10</b><br>ISI: 8.56 ± 5.28<br>Actigraphy Sleep Efficiency (%): 87 ± 5.2<br>DLMO (hour: minutes): 19:58 ± 1.58                                                                                                                                                                                                                                                                                                                                                                                         |
| Burns et al, 2019 [68]                          | Self-reported sleep quality                  | Single item: “Last night, your sleep quality was. . .?” Likert, 5-points: 1 (very poor), 2 (poor), 3 (fair), 4 (good), and 5 (very good). | Single item on sleep quality: 3.03 ± 0.55<br>PSQI: <b>8.14 ± 5.29</b> (email communication, April 2020)                                                                                                                                                                                                                                                                                                                                                                                                                 |
| Chapman et al, 2006 [53]                        | Self-reported sleep quality and disturbances | PSQI                                                                                                                                      | PSQI global score: <b>11.63 ± 4.64</b> .<br><b>85% (n=169) reported PSQI global scores &gt; 5 (indicates poor sleep)</b> . 35.8% (n=72) were taking prescribed sleep medications.                                                                                                                                                                                                                                                                                                                                       |
| Eakmen et al, 2017 [39]                         | Self-reported difficulty with sleep quality  | PROMIS-Sleep Disturbance – 8 items, and PSQI-A                                                                                            | PROMIS-Sleep Disturbance = 59.54 (3.7) <sup>§</sup> ,<br>PSQI-A = 7.36 (5.36) <sup>§</sup>                                                                                                                                                                                                                                                                                                                                                                                                                              |
| Hoot et al, 2018 [49]                           | Self-reported sleep quality and disturbances | PSQI                                                                                                                                      | Data are: median (range)<br>PSQI TBI group: <b>11</b> (1-21)<br>PSQI no TBI group: <b>8</b> (1-18)                                                                                                                                                                                                                                                                                                                                                                                                                      |

| Citation (year)                                         | Type of Sleep Disorders / Sleep Disturbance                                    | Sleep Measure(s)                                                                                                                                                                                                                                                                                                                                                        | Baseline Sleep (mean ± SD); abnormal values per threshold criteria are bolded, when applicable*                                                                                                                                      |
|---------------------------------------------------------|--------------------------------------------------------------------------------|-------------------------------------------------------------------------------------------------------------------------------------------------------------------------------------------------------------------------------------------------------------------------------------------------------------------------------------------------------------------------|--------------------------------------------------------------------------------------------------------------------------------------------------------------------------------------------------------------------------------------|
| <b>Group 1: Self-reported sleep disturbance (cont.)</b> |                                                                                |                                                                                                                                                                                                                                                                                                                                                                         |                                                                                                                                                                                                                                      |
| Hughes et al, 2013 [50]                                 | Self-reported sleep quality and disturbances & self-reported insomnia symptoms | PSQI, ISI                                                                                                                                                                                                                                                                                                                                                               | PSQI: <b>7.5</b><br>58% had PSQI > 5<br>Mean ISI: <b>8.5</b><br>50% had at least mild insomnia symptoms                                                                                                                              |
| Koffel et al, 2016 [45]                                 | Self-reported sleep disturbance                                                | Selected items from PROMIS Sleep Disturbance and Fatigue scales, ( <i>not scored per PROMIS system; rather, total score ranged from 4 to 20, with higher scores indicating greater levels of sleep impairment and fatigue</i> )<br>PHQ-9: 2 sleep complaints items, and SF-36: vitality scale ( <i>transformed score range: 0-100; lower scores: reduced vitality</i> ) | PROMIS-Sleep Disturbance: $12.7 \pm 4.3^{\S}$<br>PROMIS Fatigue: $12.4 \pm 4.3^{\S}$<br>PHQ-9 sleep disturbance item: $1.4 \pm 0.8^{\S}$<br>PHQ-9 fatigue item: $1.4 \pm 0.7878^{\S}$<br>SF-36 Vitality scale: $40.6 \pm 22.65^{\S}$ |
| Koffel et al, 2019 [65]                                 | Self-reported sleep disturbance                                                | PROMIS-Sleep Disturbance – 8 items                                                                                                                                                                                                                                                                                                                                      | PROMIS-Sleep Disturbance (severe sleep dist. group defined as baseline PSQI $\geq$ 30): $33.5 \pm 2.8$<br>PROMIS-Sleep Disturbance (no severe sleep dist. group; PSQI<30): $20.5 \pm 6.2$                                            |
| Munds, 2017 [52]                                        | Self-reported sleep disturbance                                                | ISDI: Daytime Disturbances subscale                                                                                                                                                                                                                                                                                                                                     | ISDI: $8.4 \pm 4.17$ (range 6-10)                                                                                                                                                                                                    |
| Powel et al, 2015 [63]                                  | Self-reported sleep quality and disturbances                                   | PSQI                                                                                                                                                                                                                                                                                                                                                                    | PSQI: <b>9.26 ± 4.77</b>                                                                                                                                                                                                             |
| Ruff et al, 2009 [59]                                   | Self-reported sleep impairment                                                 | Two questions: (1) “Is your sleep impaired due to nightmares or for any other reason?” and (2) “When you awake from sleep at the end of your sleeping period, do you feel rested?”                                                                                                                                                                                      | 94.2% (n=69) reported unrestful sleep with nocturnal arousals associated with nightmares, agitated sleep, or both.                                                                                                                   |
| Ruff et al, 2012 [58]                                   | Self-reported excessive daytime sleepiness                                     | ESS                                                                                                                                                                                                                                                                                                                                                                     | ESS: <b>16 ± 0.3</b>                                                                                                                                                                                                                 |
| Sangani & Baker, 2016 [41]                              | Self-reported sleep quality and disturbances                                   | PSQI: Sleep Disturbance component only                                                                                                                                                                                                                                                                                                                                  | <b>Only 22% of participants reported global PSQI scores &lt; 5</b>                                                                                                                                                                   |
| Tighe et al, 2020 [64]                                  | Self-reported sleep disturbance                                                | PHQ-8 single item: how often in the preceding two weeks bothered by “trouble falling or staying asleep, or sleeping too much”.                                                                                                                                                                                                                                          | PHQ-8 sleep disturbance item: $1.41 \pm 1.18$                                                                                                                                                                                        |

| Citation (year)                          | Type of Sleep Disorders / Sleep Disturbance                          | Sleep Measure(s) ( <i>threshold criteria, if applicable</i> )                                                                                                                                                                                                    | Baseline Sleep (mean ± SD); abnormal values per threshold criteria are bolded, when applicable*                                                                                                                                                                                    |
|------------------------------------------|----------------------------------------------------------------------|------------------------------------------------------------------------------------------------------------------------------------------------------------------------------------------------------------------------------------------------------------------|------------------------------------------------------------------------------------------------------------------------------------------------------------------------------------------------------------------------------------------------------------------------------------|
| <b>Group 2: Diagnosed sleep disorder</b> |                                                                      |                                                                                                                                                                                                                                                                  |                                                                                                                                                                                                                                                                                    |
| Amin et al, 2011 [40]                    | Sleep Disordered Breathing (SDB)                                     | Full-night diagnostic PSG. SDB events defined as: apneas = ↓ airflow to <20% of waking levels for at least 10 seconds, and hypopneas = ↓ airflow to <50% of waking levels with arousal, and PSQI.                                                                | AHI: <b>19.95 ± 25.35</b> <sup>§</sup><br>SE: 77.02 ± 17.18 <sup>§</sup><br>PSQI: <b>11.9 ± 4.2</b> <sup>§</sup>                                                                                                                                                                   |
| Card et al, 2018 [54]                    | Obstructive sleep apnea                                              | ICD-9 OSA diagnose codes from EHR                                                                                                                                                                                                                                | 10.6% (n = 94,296) had OSA diagnosis                                                                                                                                                                                                                                               |
| Cunningham & Oehlert, 2018 [48]          | Obstructive sleep apnea, insomnia, circadian rhythm disruption, etc. | ICD-9 Codes: 327.20, 327.21, 327.22, 327.23, 327.24, 327.25, 327.26, 327.27, 327.29, 780.51, 780.53, 780.55, 780.56, 780.57, 780.58, 307.40, 307.41, 307.42, 307.43, 307.44, 307.45, 307.46, 307.47, 307.48, 307.49, 780.50, 780.52, 780.54, 780.59 <sup>†</sup> | Diagnoses were: 35.65% (n=1,953) SDB, 21.65% (n=1,186) insomnia or other sleep/circadian rhythm disorder, 42.7% (n=2,339) with both SDB and insomnia or other.                                                                                                                     |
| Jaoude et al, 2016 [60]                  | Obstructive sleep apnea                                              | In laboratory diagnostic PSG: AHI was ≥ 5/h                                                                                                                                                                                                                      | Chronic opiate group proportion of mild, moderate, and severe OSA: 22%, 34%, and 44% versus 21%, 28%, and 40% respectively in control group.                                                                                                                                       |
| Jaramillo et al, 2016 [44]               | Insomnia Disorder                                                    | ICD-9-CM Codes: 780.5 and 786.09                                                                                                                                                                                                                                 | Insomnia dx. freq. at baseline in headache group (n=5,264): 21.88% (n=1,152)                                                                                                                                                                                                       |
| Koffel, Amundson, & Wisdom, 2019 [61]    | Insomnia Disorder                                                    | ISI                                                                                                                                                                                                                                                              | Mean ISI: <b>19</b>                                                                                                                                                                                                                                                                |
| Lang et al, 2014 [55]                    | Insomnia Disorder                                                    | ISI > 15 for insomnia diagnosis                                                                                                                                                                                                                                  | Insomnia frequency: 73%. ISI: <b>18.05 ± 6.6</b>                                                                                                                                                                                                                                   |
| Martin et al, 2017 [42]                  | Insomnia Disorder                                                    | Survey addressing ICSD-2 diagnostic criteria                                                                                                                                                                                                                     | Insomnia prevalence: 51.5% (n=345).<br>Overall sleep quality (n=670): very good (13.7%), fairly good (44.2%), fairly bad (34.8%), and very bad (7.4%).<br>Overall sleep difficulty (n=670): difficulty staying asleep (67.5%), falling asleep (52.1%), and early awakenings (62%). |



| Citation (year)                                  | Type of Sleep Disorders / Sleep Disturbance                     | Sleep Measure(s) ( <i>threshold criteria, if applicable</i> ) | Baseline Sleep (mean $\pm$ SD); abnormal values per threshold criteria are bolded, when applicable* |
|--------------------------------------------------|-----------------------------------------------------------------|---------------------------------------------------------------|-----------------------------------------------------------------------------------------------------|
| <b>Group 2: Diagnosed sleep disorder (cont.)</b> |                                                                 |                                                               |                                                                                                     |
| Travaglini et al, 2019 [51]                      | Subthreshold Insomnia Disorder (defined as ISI score $\geq 8$ ) | ISI: for eligibility screening only, and PSQI                 | PSQI: <b>13.86 <math>\pm</math> 2.68</b><br>ISI: <b>18.67 <math>\pm</math> 4.24</b>                 |
| Taylor et al, 2019 [46]                          | Obstructive sleep apnea                                         | OSA diagnoses (ICD-9 & ICD-10 codes <sup>†</sup> )            | Not reported                                                                                        |
| Weiner et al, 2019 [47]                          | Insomnia disorder (defined as ISI score > 11)                   | ISI                                                           | Insomnia prevalence: 63.8%                                                                          |

Notes. † = Data comes directly from the author or subsequent publication assessing the same sample. § = pooled estimate (data was pooled where there were no significant differences between studied groups). 36-Item short-form health survey (SF-36), apnea-hypopnea index (AHI), dim light melatonin onset (DLMO), electronic health record (EHR), Epworth sleepiness scale (ESS), functional outcomes of sleep questionnaire (FOSQ-10), Iowa sleep disturbances inventory (ISDI), insomnia severity index (ISI), international classification of diseases - 9<sup>th</sup> edition (ICD-9), international classification of diseases - 10<sup>th</sup> edition (ICD-10) international classification of sleep disorders, 2nd edition (ICSD-2), obstructive sleep apnea (OSA), patient health questionnaire-9 (PHQ-9), patient-reported outcomes measurement information system (PROMIS), Pittsburgh sleep quality index (PSQI), Pittsburgh sleep quality index addendum for PTSD (PSQI-A), polysomnography (PSG), standard deviation (SD), sleep disordered breathing (SDB), and sleep efficiency (SE). \* = Threshold criteria, when applicable are: AHI ( $\geq 15$ , but < 30 per hour: moderate OSA), ESS ( $\geq 11$ : *excessive daytime sleepiness*), FOSQ-10 (range: 5-20; higher scores: better functional status), ISI ( $\geq 15$ : clinical insomnia), PROMIS-Sleep Disturbance – 8 items (*T-scores range: 28–76.5; mean: 50; higher scores: more sleep disturbances*), PSQI ( $\geq 5$ : “poor” sleeper), and PSQI-A (*range: 0-21; higher scores: greater more PTSD-related sleep disturbances*)

**Table 3S.** Pain characteristics

| Citation (year)          | Pain Primary Outcome (Yes/No) | Type of Pain                                       | Duration of Pain | Pain Measure(s)                                                                                                                                                                                          | Baseline Pain (mean ± SD)                                                                                                                                                                                                                                                                                                     |
|--------------------------|-------------------------------|----------------------------------------------------|------------------|----------------------------------------------------------------------------------------------------------------------------------------------------------------------------------------------------------|-------------------------------------------------------------------------------------------------------------------------------------------------------------------------------------------------------------------------------------------------------------------------------------------------------------------------------|
| Amin et al, 2011 [40]    | Yes                           | Chronic pain (involving at least two body regions) | > 6 months       | VAS rated 0–10                                                                                                                                                                                           | 5.11 ± 2.77                                                                                                                                                                                                                                                                                                                   |
| Balba et al, 2019 [43]   | Yes                           | Chronic headache                                   | NR               | PROMIS Global Health Survey, item 7: a 11-point Likert scale for overall pain level (0 = no pain to 10 = worst pain)                                                                                     | All subjects: 4.07 ± 2.48 <sup>†</sup><br>Neither group: 3.44 ± 2.27 <sup>†</sup><br>TBI group: 4.20 ± 2.46 <sup>†</sup><br>PTSD group: 5.00 ± 2.58 <sup>†</sup><br>TBI+PTSD group: 5.89 ± 1.98 <sup>†</sup>                                                                                                                  |
| Burgess et al, 2019 [67] | Yes                           | Chronic low back pain                              | > 6 months       | PROMIS Pain Intensity, PROMIS Pain Behavior, PROMIS Pain Interference, and PROMIS Physical Function, and pain sensitivity (heat & ischemia stimulus)                                                     | PROMIS Pain Intensity: 48.84 ± 6.30<br>PROMIS Pain Behavior: 56.67 ± 6.49<br>PROMIS Pain Interference: 56.39 ± 8.33<br>PROMIS Physical Function: 44.21 ± 8.66<br>Ischemic threshold, sec 81.48 ± 119.8<br>Ischemic tolerance, sec 187.88 ± 160.13<br>Thermal threshold, °C 42.95 ± 3.68<br>Thermal tolerance, °C 47.09 ± 1.64 |
| Burns et al, 2019 [68]   | Yes                           | Chronic low back pain                              | > 6 months       | Two items: pain intensity (“How intense was your pain?”) and interference (“To what degree did your pain interfere with you being physically active?”); 9-point scale (0 = not at all to 8 = extremely). | Pain Intensity: 2.5 ± 1.28<br>Pain Interference: 1.99 ± 1.20                                                                                                                                                                                                                                                                  |

| Citation (year)                 | Pain Primary Outcome (Yes/No) | Type of Pain                                                                                           | Duration of Pain | Pain Measure(s)                                                                                                                                                                                                                            | Baseline Pain (mean ± SD)                                                                                                                   |
|---------------------------------|-------------------------------|--------------------------------------------------------------------------------------------------------|------------------|--------------------------------------------------------------------------------------------------------------------------------------------------------------------------------------------------------------------------------------------|---------------------------------------------------------------------------------------------------------------------------------------------|
| Card et al, 2018 [54]           | Yes                           | Current pain                                                                                           | NR               | Numeric scale rated 0-10 (categorized as: mild if 0-3, moderate/severe if 4-10)                                                                                                                                                            | 32% (n= 274,632) reported pain of moderate/severe intensity                                                                                 |
| Chapman et al, 2006 [53]        | Yes                           | Chronic Pain (musculoskeletal = 61%, neuropathic = 30%, visceral = 2.5, other [e.g., headache] = 6.5%) | NR               | The Multidimensional Pain Inventory (MPI): pain severity, pain interference, and general activity level scales only                                                                                                                        | Severity: 4.48 ± 1.27<br>Interference: 4.37 ± 1.27<br>General activity level: 1.92 ± 0.92                                                   |
| Cunningham & Oehlert, 2018 [48] | Yes                           | Current pain                                                                                           | NR               | The Millon Behavioral Medicine Diagnostic (MBMD): Pain sensitivity scale                                                                                                                                                                   | Average MBMD score (SEM): for those with sleep disorder (n=5,478) = 76.3 ± .31 versus those without sleep disorder (n = 3,925) = 69.8 ± .40 |
| Eakmen et al, 2017 [39]         | Yes                           | Current pain                                                                                           | NR               | PROMIS-PI (pain interference)                                                                                                                                                                                                              | PROMIS-PI = 59.12 ± 9                                                                                                                       |
| Hoot et al, 2018 [49]           | Yes                           | Current pain                                                                                           | NR               | EuroQol group 5 dimension 5 level (EQ-5D-5L) scale (5-point scale; rate pain from none to extreme) and the TBI Quality of Life (TBI-QoL) pain interference scale (10 items on a 5-point ordinal scale; higher score: greater interference) | Pain interference, TBI exposed group = 24.24 ± 10.55, No TBI group = 17.43 ± 8.17                                                           |
| Hughes et al, 2013 [50]         | No                            | Current pain <sup>†</sup>                                                                              | NR               | Geriatric Pain Measure (GPM): pain intensity subscale; 7 items <sup>†</sup>                                                                                                                                                                | NR                                                                                                                                          |
| Jaoude et al, 2016 [60]         | Yes                           | Chronic pain (causes of opiate prescription: musculoskeletal disorders = 83%, neuropathies=11%)        | ≥ 6 months       | Numerical Categorical Scale (0 to 10 points)                                                                                                                                                                                               | Pain intensity: opiate group = 2.5 ± 1.4 versus 1.6 ± 1.1 among no opiate group (control)                                                   |



| Citation (year)                                  | Pain Primary Outcome (Yes/No) | Type of Pain                                                                                   | Duration of Pain                                                                                   | Pain Measure(s)                                                                                                                                | Baseline Pain (mean ± SD)                                                                                                                                                                                                                                  |
|--------------------------------------------------|-------------------------------|------------------------------------------------------------------------------------------------|----------------------------------------------------------------------------------------------------|------------------------------------------------------------------------------------------------------------------------------------------------|------------------------------------------------------------------------------------------------------------------------------------------------------------------------------------------------------------------------------------------------------------|
| Jaramillo et al, 2016 [44]                       | Yes                           | Chronic posttraumatic headaches (PTHA) & PTHA Persistent headache                              | PTHA headaches: > 3 months. Persistent PTHA: from 1-4 years.                                       | ICD-9-CM codes; 339, 346, 784, 307.81. PTHA is persistent when diagnosed each year for 4 consecutive years – FY08-FY11.                        | Not reported                                                                                                                                                                                                                                               |
| Koffel et al, 2016 [45]                          | Yes                           | Chronic musculoskeletal pain                                                                   | ≥ 3 months                                                                                         | Brief Pain Inventory (BPI), SF-36 Bodily Pain scale, and PROMIS-PI (pain intensity & pain interference)                                        | BPI total: 5.2 ± 1.8<br>SF-36 bodily pain: 34.8 ± 16.8<br>PROMIS-PI: 11.35 ± 4.25                                                                                                                                                                          |
| <i>Koffel, Amundson, &amp; Wisdom, 2019 [61]</i> | Yes                           | Chronic pain                                                                                   | NR                                                                                                 | PEG scale (which assesses pain intensity [P], interference with enjoyment of life [E], and interference with general activity [E]; range 0-10) | Mean PEG score: 6                                                                                                                                                                                                                                          |
| <i>Koffel et al, 2019 [65]</i>                   | Yes                           | Chronic back pain or hip or knee OA pain of moderate to severe intensity despite analgesic use | ≥ 6 months                                                                                         | Brief Pain Inventory (BPI) – Short Form (rated on 0-10 scales)                                                                                 | BPI Interference Scale (severe sleep dist. group): 6.5 ± 1.6<br>BPI Severity Scale (severe sleep dist. group): 5.9 ± 1.4<br>BPI Interference Scale (no severe sleep dist. group): 5.0 ± 1.8<br>BPI Severity Scale (no severe sleep dist. group): 5.2 ± 1.3 |
| Lang et al, 2014 [55]                            | Yes                           | Current pain                                                                                   | Not reported. However, approx. 90% of subjects experienced pain other than everyday types of pain. | Brief Pain Inventory (BPI) – Short Form (rated on 0-10 scales)                                                                                 | BPI pain severity: 4.22 ± 2.26<br>BPI pain interference: 4.60 ± 2.78                                                                                                                                                                                       |

| Citation (year)            | Pain Primary Outcome (Yes/No) | Type of Pain                                                                                              | Duration of Pain                                                                                  | Pain Measure(s)                                                                                                                                                    | Baseline Pain (mean ± SD)                                                                                                                                                |
|----------------------------|-------------------------------|-----------------------------------------------------------------------------------------------------------|---------------------------------------------------------------------------------------------------|--------------------------------------------------------------------------------------------------------------------------------------------------------------------|--------------------------------------------------------------------------------------------------------------------------------------------------------------------------|
| Martin et al, 2017 [42]    | No                            | Current pain                                                                                              | NR                                                                                                | Single question: “During the past month, did any of these issues affect your sleep?” Pain was one of the items for which they could circle yes or no. <sup>†</sup> | NR                                                                                                                                                                       |
| Munds, 2017 [52]           | Yes                           | Chronic pain                                                                                              | > 3 months (self-reported) <sup>†</sup>                                                           | Chronic Pain Grade Questionnaire (CPGC); disability subscale                                                                                                       | CPGC disability scale: 7.3 ± 7.02 (range 6-10)                                                                                                                           |
| Powel et al, 2015 [63]     | Yes                           | Current pain & Chronic pain                                                                               | Current pain (over the last 30 days). Of note, 38% (n=65) of the sample had chronic pain (>3 mo.) | McGill Short Form Pain Questionnaire visual analogue scale (VAS) of pain only (score range: 0-100)                                                                 | McGill VAS: 30.07 ± 25.43                                                                                                                                                |
| Ruff et al, 2009 [59]      | Yes                           | Chronic posttraumatic headache pain (40.54 % tension-like, 18.92 % migraine-like, and 40.54 % mixed-type) | NR                                                                                                | Numerical pain rating scale (0 to 10 points) & number of headaches per month                                                                                       | Headache frequency = 12.4 ± 0.94; 95% had >4 headache episodes/month; 42% had >10 headache episodes/month<br>14% had daily headaches<br>Headache intensity = 7.28 ± 0.27 |
| Ruff et al, 2012 [58]      | Yes                           | Chronic posttraumatic headache pain (38% tension-like, 21% migraine-like, and 40% mixed-type)             | NR                                                                                                | Numerical pain rating scale (0 to 10 points) & number of headaches per month                                                                                       | Headache frequency = 13.3 ± 0.71<br>Headache intensity = 7.32 ± 0.17                                                                                                     |
| Sangani & Baker, 2016 [41] | Yes                           | Chronic Pain (Rheumatoid arthritis)                                                                       | NR                                                                                                | RAPID 3 form (which includes a VAS pain severity question; range for pain subscale: 0-10)                                                                          | VAS pain severity: 5.82 ± 2.90 <sup>†</sup>                                                                                                                              |

| Citation (year)             | Pain Primary Outcome (Yes/No) | Type of Pain                      | Duration of Pain                                                                                                                                      | Pain Measure(s)                                                                                                                                                                  | Baseline Pain (mean ± SD)                                                                                                                                                                                                           |
|-----------------------------|-------------------------------|-----------------------------------|-------------------------------------------------------------------------------------------------------------------------------------------------------|----------------------------------------------------------------------------------------------------------------------------------------------------------------------------------|-------------------------------------------------------------------------------------------------------------------------------------------------------------------------------------------------------------------------------------|
| Taylor et al, 2019 [46]     | Yes                           | Low Back Pain                     | NR                                                                                                                                                    | Low back pain diagnosis (ICD-9 & ICD-10 codes <sup>†</sup> )                                                                                                                     | NR                                                                                                                                                                                                                                  |
| Tighe et al, 2020 [64]      | Yes                           | Knee pain consistent with knee OA | NR                                                                                                                                                    | Pain severity scale (rate: 0–10) and Pain Catastrophizing Scale (PCS).                                                                                                           | Pain severity: not reported.<br>PCS: 19.11 ± 12.35                                                                                                                                                                                  |
| Travaglini et al, 2019 [51] | No                            | Current pain                      | Over 40% of participants reported a possible chronic pain condition such as osteoarthritis, rheumatoid arthritis, bone or joint problems <sup>†</sup> | Pain Numeric Rating Scale (PNRS; score range: 0-10) & one pain interference item from Short Form 12 Health Survey (SF-12; rated on a 5-point scale, “not at all” to “extremely”) | PNRS: 5.29 ± 2.62<br>71.9% reported moderate-to-severe pain (PNRS <sub>≥4</sub> )<br>SF-12: 3.12 ± 1.28                                                                                                                             |
| Weiner et al, 2019 [47]     | Yes                           | Chronic low back pain (CLBP)      | ≥ 6 months                                                                                                                                            | 0 to 10 scale, last 7-day average and worst pain (severity); Roland Morris questionnaire (back pain disability)                                                                  | Pain severity (average past week): 6.15 ± 1.96 (2-10, range)<br>Pain severity (worst past week): 8.36 ± 1.79 (3-10, range)<br>Pain duration (months): 224.7 ± 197.8 (3.0-632.7, range)<br>Roland Morris: 14.25 ± 4.52 (3-22, range) |

Notes. † = Data comes directly from the author or subsequent publication. Not reported (NR), osteoarthritis (OA), patient-reported outcomes measurement information system (PROMIS), and standard error of measurement (SEM).

**Table 4S.** Definitions of sleep disturbance across selected studies

| Citation (year)          | Sleep Disturbance Definition Used in The Article                                                                                                                                                                                                                          | Sleep Disturbance Measure(s)                                                                                                                              |
|--------------------------|---------------------------------------------------------------------------------------------------------------------------------------------------------------------------------------------------------------------------------------------------------------------------|-----------------------------------------------------------------------------------------------------------------------------------------------------------|
| Balba et al, 2018 [43]   | No definition stated. However, sleep disturbances are used as synonyms for sleep disorders such insomnia, hypersomnia, OSA, and circadian rhythm disorders.                                                                                                               | ISI, FOSQ-10                                                                                                                                              |
| Burgess et al, 2019 [67] | NR                                                                                                                                                                                                                                                                        | PSQI, ISI, and wrist actigraphy                                                                                                                           |
| Burns et al, 2019 [68]   | NR                                                                                                                                                                                                                                                                        | Single item on sleep quality                                                                                                                              |
| Chapman et al, 2006 [53] | NR                                                                                                                                                                                                                                                                        | PSQI                                                                                                                                                      |
| Eakmen et al, 2017[39]   | No definition stated. However, sleep disturbance is used as a synonym of insomnia symptoms (difficulty falling or staying asleep), but also includes dissatisfaction with sleep quality and duration, and incorporates disruptive nocturnal behaviors (e.g., nightmares). | PROMIS-SD, PSQI-A                                                                                                                                         |
| Hoot et al, 2018 [49]    | NR                                                                                                                                                                                                                                                                        | PSQI                                                                                                                                                      |
| Hughes et al, 2013 [49]  | NR                                                                                                                                                                                                                                                                        | PSQI                                                                                                                                                      |
| Munds, 2017 [52]         | No definition stated. Sleep disturbances are discussed in the context of insomnia. Of note, the Daytime Disturbances ISDI subscale used to assess sleep disturbances in the study has 2 additional subscales: fatigue & nonrestorative sleep subscales.                   | Iowa Sleep Disturbances Inventory (ISDI): Daytime Disturbances subscale                                                                                   |
| Koffel et al, 2016 [45]  | Two independent but related lower order dimensions: “insomnia (difficulties falling and staying asleep) and lassitude (fatigue and sleepiness)”                                                                                                                           | sleep disturbance and fatigue PHQ-9 items, PROMIS-SD, PROMIS-Fatigue                                                                                      |
| Koffel et al, 2019 [65]  | NR                                                                                                                                                                                                                                                                        | PROMIS-SD                                                                                                                                                 |
| Powell et al, 2015 [63]  | NR                                                                                                                                                                                                                                                                        | PSQI                                                                                                                                                      |
| Ruff et al, 2009 [59]    | No definition stated. However, authors talk about “impaired sleep” which is manifested as being unrestful and in the presence of nightmares                                                                                                                               | “Is your sleep impaired due to nightmares or for any other reason?” & “When you awake from sleep at the end of your sleeping period, do you feel rested?” |
| Ruff et al, 2012 [58]    | NR                                                                                                                                                                                                                                                                        | ESS                                                                                                                                                       |

| <b>Citation (year)</b>     | <b>Sleep Disturbance Definition Used in The Article</b>                                                          | <b>Sleep Disturbance Measure(s)</b>    |
|----------------------------|------------------------------------------------------------------------------------------------------------------|----------------------------------------|
| Sangani & Baker, 2016 [41] | NR                                                                                                               | PSQI: Sleep Disturbance component only |
| Tighe et al, 2020 [64]     | No definition stated, but operationalized by assessing “trouble falling or staying asleep, or sleeping too much” | PHQ-8 sleep disturbance single item    |

*Notes.* Epworth sleepiness scale (ESS), functional outcomes of sleep questionnaire (FOSQ-10), Iowa sleep disturbances inventory (ISDI), insomnia severity index (ISI), not reported (NR), patient health questionnaire-9 (PHQ-9), Pittsburgh sleep quality index (PSQI).

**Table 5S.** Detailed table of main findings on the influence of sleep disturbance and sleep disorders on pain outcomes among veterans

| Citation (year)                                                        | Baseline adjusted variables                                                                                     | Independent (sleep) variable(s)                          | Dependent (self-reported pain) outcome(s)                    | Results: Poor or worsened sleep                                                                                                                   | Results: Good or improved sleep                                  |
|------------------------------------------------------------------------|-----------------------------------------------------------------------------------------------------------------|----------------------------------------------------------|--------------------------------------------------------------|---------------------------------------------------------------------------------------------------------------------------------------------------|------------------------------------------------------------------|
| <b>Group 1: Observational Studies (without treating pain or sleep)</b> |                                                                                                                 |                                                          |                                                              |                                                                                                                                                   |                                                                  |
| Balba et al, 2018 [43]                                                 | n/a                                                                                                             | Self-reported insomnia symptoms                          | Pain severity                                                | pain severity across all studied groups: TBI only [ $r = .37$ ]**, PTSD only [ $r = .22$ ]*, TBI + PTSD [ $r = .30$ ]*, Neither [ $r = .293$ ]*** | NR                                                               |
| Card et al, 2018 [54]                                                  | Age, sex, race, BMI, smoking status, and mental health diagnoses (substance use, PTSD, depression, and anxiety) | OSA diagnosis                                            | Pain intensity                                               | likelihood of reporting moderate/severe pain intensity (aOR = 1.28; 95% CI 1.27-1.30)                                                             | NR                                                               |
| Chapman et al, 2006 [53]                                               | Analysis #1: Opioid prescription, baseline pain, 2-month sleep med. prescription, and depressive symptoms       | Self-reported sleep quality and sleep disturbance        | Pain severity, Pain interference, and General activity level | Did not predict any of the studied pain outcomes                                                                                                  | NR                                                               |
|                                                                        | Analysis #2: Opioid prescription, baseline pain, sleep quality and disturbance, and depressive symptoms         | Sleep medication prescription                            | Pain severity, Pain interference, and General activity level | NR                                                                                                                                                | Taking sleep medications were not associated with pain outcomes. |
| Cunningham & Oehlert, 2018 [48]                                        | n/a                                                                                                             | Sleep disorder diagnoses (see list of codes on Table 2S) | Pain sensitivity                                             | pain sensitivity*** (with vs. without diagnoses; $t=12.9$ )                                                                                       | NR                                                               |

| Citation (year)                                                                | Baseline adjusted variables                                                                                                                            | Independent (sleep) variable(s)                                                                                                  | Dependent (self-reported pain) outcome(s)                            | Results: Poor or worsened sleep                                                                                                                     | Results: Good or improved sleep                                                                                                                      |
|--------------------------------------------------------------------------------|--------------------------------------------------------------------------------------------------------------------------------------------------------|----------------------------------------------------------------------------------------------------------------------------------|----------------------------------------------------------------------|-----------------------------------------------------------------------------------------------------------------------------------------------------|------------------------------------------------------------------------------------------------------------------------------------------------------|
| <b>Group 1: Observational Studies (without treating pain or sleep) (cont.)</b> |                                                                                                                                                        |                                                                                                                                  |                                                                      |                                                                                                                                                     |                                                                                                                                                      |
| Hoot et al, 2018 [49]                                                          | Age, site, time since index injury, depression, PTSD, anxiety, combat exposure, combat duration, number of controlled and uncontrolled blast exposures | Self-reported sleep quality and sleep disturbance                                                                                | Pain intensity & Pain interference                                   | pain interference ( $\beta = 0.41$ )* and pain intensity ( $\beta = 0.05$ )*                                                                        | NR                                                                                                                                                   |
| Hughes et al, 2013 [50]                                                        | Analysis #1: n/a                                                                                                                                       | Self-reported sleep quality and sleep disturbance                                                                                | Pain intensity                                                       | pain intensity**                                                                                                                                    | NR                                                                                                                                                   |
|                                                                                | Analysis #2: n/a                                                                                                                                       | Self-reported insomnia symptoms                                                                                                  | Pain intensity                                                       | pain intensity***                                                                                                                                   | NR                                                                                                                                                   |
| Jaramillo et al, 2016 [44]                                                     | Demographic and military characteristics, TBI, PTSD, and/or postconcussive symptoms.                                                                   | Insomnia disorder diagnosis                                                                                                      | Posttraumatic headaches (PTHA) prevalence & PTHA persistence         | Insomnia diagnosis at baseline was associated with: headache prevalence (aOR: 1.97 [1.81-2.15]) *** headache persistence (aOR: 1.19 [1.02-1.39])*** | NR                                                                                                                                                   |
| Koffel et al, 2016 [45]                                                        | Baseline covariates (education, income, pain sites, duration of pain, medical comorbidities, and treatment group) and depression & anxiety symptoms.   | Changes in self-reported sleep disturbance (insomnia symptoms [difficulties falling and staying asleep] and lassitude [fatigue]) | Pain (intensity & interference, loaded as a single factor after EFA) | NR                                                                                                                                                  | Improvements in sleep disturbance symptoms from baseline to 3 months predicted ↓ ↓ pain (intensity & interference) ( $\beta = .29$ ) at 12 months*** |

| Citation (year)                                                                | Baseline adjusted variables                        | Independent (sleep) variable(s) | Dependent (self-reported pain) outcome(s) | Results: Poor or worsened sleep                                                                                                                                                                                                                                              | Results: Good or improved sleep                                                                              |
|--------------------------------------------------------------------------------|----------------------------------------------------|---------------------------------|-------------------------------------------|------------------------------------------------------------------------------------------------------------------------------------------------------------------------------------------------------------------------------------------------------------------------------|--------------------------------------------------------------------------------------------------------------|
| <b>Group 1: Observational Studies (without treating pain or sleep) (cont.)</b> |                                                    |                                 |                                           |                                                                                                                                                                                                                                                                              |                                                                                                              |
| Koffel et al, 2019 [65]                                                        | Baseline BPI values and treatment group assignment | Self-reported sleep disturbance | Pain severity & Pain interference         | pain interference (6.5 vs 5.0)*** and pain severity (5.9 vs 5.2)*** on severe baseline sleep disturbance group, versus those without severe sleep disturbance. ↓ ↓ improvement in pain interference ( $\beta = 0.058$ )*** and pain severity ( $\beta = 0.026$ )*            | NR                                                                                                           |
| Koffel, Amundson, & Wisdom, 2019 [61]                                          | n/a                                                | n/a                             | Pain perception                           | NR                                                                                                                                                                                                                                                                           | Improvements in sleep “enhanced functionality [ <i>and quality of life</i> ] in the context of chronic pain” |
| Lang et al, 2014 [55]                                                          | Service connection (mediation models only)         | Self-reported insomnia symptoms | Pain severity & Pain interference         | pain severity (Person’s $r = .53$ ; $\beta = 0.18$ )**; pain interference (Person’s $r = .57$ ; $\beta = 0.23$ )** Partially mediated relationship between PTSD symptoms and pain severity ( $\beta = 0.12$ )** and PTSD symptoms and pain interference ( $\beta = 0.13$ )** | NR                                                                                                           |
| Martin et al, 2017 [42]                                                        | n/a                                                | Insomnia disorder diagnosis     | Pain interference with sleep              | frequency of pain interference on sleep was reported among women veterans with insomnia diagnosis than those without insomnia (62.7% vs. 36.9%) ***                                                                                                                          | NR                                                                                                           |
| Munds, 2017 [52]                                                               | None                                               | Self-reported sleep disturbance | Pain-related disability                   | Sleep disturbance did not moderate the relationship between PTSD and disability due to chronic pain                                                                                                                                                                          | NR                                                                                                           |



| Citation (year)                                                                | Baseline adjusted variables                                                                                                                                          | Independent (sleep) variable(s)                   | Dependent (self-reported pain) outcome(s) | Results: Poor or worsened sleep                                                                                                                                               | Results: Good or improved sleep |
|--------------------------------------------------------------------------------|----------------------------------------------------------------------------------------------------------------------------------------------------------------------|---------------------------------------------------|-------------------------------------------|-------------------------------------------------------------------------------------------------------------------------------------------------------------------------------|---------------------------------|
| <b>Group 1: Observational Studies (without treating pain or sleep) (cont.)</b> |                                                                                                                                                                      |                                                   |                                           |                                                                                                                                                                               |                                 |
| Powel et al, 2015 [63]                                                         | PTSD severity, current mood disorder diagnosis, current anxiety disorder diagnosis, and alcohol use.                                                                 | Self-reported sleep quality and sleep disturbance | Pain severity in the last 30 days         | pain severity ( $\beta = .28$ ) ** among the total sample (presumed chronic pain), but not among the subset (n=65) with confirmed chronic pain                                | NR                              |
| Sangani & Baker, 2016 [41]                                                     | n/a                                                                                                                                                                  | Self-reported sleep disturbance                   | Pain intensity                            | pain intensity (Spearman's $\rho = 0.44$ )*                                                                                                                                   | NR                              |
| Taylor et al, 2019 [46]                                                        | Age, race, sex, combat exposure, Charlson comorbidity index, marital status, and combat exposure <sup>†</sup>                                                        | OSA diagnosis                                     | Low back pain diagnosis                   | odds of LBP diagnosis (aOR 8.99 [95% CI: 7.07, 11.35]); OSA diagnosis mediated the effect of PTSD on risk of LBP diagnosis, explaining 25% of the risk (95% CI, 19.6%, 31.1%) | NR                              |
| Tighe et al, 2020 [64]                                                         | Sociodemographic and clinical characteristics (e.g., age, BMI, race, education, income, depression and anxiety history, radiographic evidence of OA, and opioid use) | Self-reported sleep disturbance                   | Pain severity & Pain catastrophizing.     | Frequency of sleep disturbance was associated with: pain severity ( $\beta = 3.58$ )*** and pain catastrophizing ( $\beta = 2.47$ )***                                        | NR                              |
| Travaglini et al, 2019 [51]                                                    | n/a                                                                                                                                                                  | Self-reported sleep quality and sleep disturbance | Pain intensity & Pain interference        | pain interference (Pearson's $r = .32$ )*, but not pain intensity ( $r = .20$ )                                                                                               | NR                              |
| Weiner et al, 2019 [47]                                                        | n/a                                                                                                                                                                  | Insomnia disorder diagnosis                       | Pain disability & Pain severity           | Back pain disability*, but not pain severity                                                                                                                                  | NR                              |

| Citation (year)                                                                                                     | Baseline adjusted variables                                             | Independent (sleep) variable(s)                | Dependent (self-reported pain) outcome(s)                                                                        | Results: Poor or worsened sleep | Results: Good or improved sleep                                                                                                                                                                                                                                                                                 |
|---------------------------------------------------------------------------------------------------------------------|-------------------------------------------------------------------------|------------------------------------------------|------------------------------------------------------------------------------------------------------------------|---------------------------------|-----------------------------------------------------------------------------------------------------------------------------------------------------------------------------------------------------------------------------------------------------------------------------------------------------------------|
| <b>Group 2: Experimental, quasi-Experimental Studies, or observational studies with treatment of pain or sleep.</b> |                                                                         |                                                |                                                                                                                  |                                 |                                                                                                                                                                                                                                                                                                                 |
| Amin et al, 2011 [40]                                                                                               | n/a                                                                     | Nasal CPAP (treatment) vs. sham CPAP (control) | Pain severity                                                                                                    | NR                              | Treatment of SDB with CPAP significantly ↓ ↓ pain intensity (34%; SMD = 2.14) ***                                                                                                                                                                                                                               |
| Burgess et al, 2019 [67]                                                                                            | n/a                                                                     | Morning bright light therapy                   | Pain intensity, pain behavior, pain interference, pain sensitivity (objectively measured), and physical function | NR                              | ↓ ↓ pain intensity* (48.84 ± 6.30 vs. 47.02 ± 7.77), ↓ ↓ pain behavior* (56.67 ± 6.49 vs. 54.63 ± 8.09), and ↓ ↓ pain sensitivity*( thermal pain threshold: 42.95 ± 3.68 to 43.72 ± 3.11) from baseline to 13 days post-treatment.                                                                              |
| Burns et al, 2019 [68]                                                                                              | The three study epochs: baseline, bright light treatment, and follow-up | Morning bright light therapy                   | Pain intensity, Pain intensity volatility, and Pain interference                                                 | NR                              | ↓ ↓ mean pain intensity*** during post-treatment ( $\beta = -0.20$ , SE = 0.04) and follow-up ( $\beta = -0.21$ , SE = 0.04) compared with baseline. ↓ ↓ pain intensity volatility*** during post-treatment ( $\beta = -0.90$ , SE = 0.13) and follow-up ( $\beta = -0.83$ , SE = 0.13) compared with baseline. |
| Eakmen et al, 2017 [39]                                                                                             | n/a                                                                     | Multicomponent CBT-I                           | Pain interference                                                                                                | NR                              | ↓ ↓ pain interference (Cohen's $d = 0.45$ ) from baseline to post-treatment                                                                                                                                                                                                                                     |

| Citation (year)                                                                                                             | Baseline adjusted variables | Independent (sleep) variable(s) | Dependent (self-reported pain) outcome(s) | Results: Poor or worsened sleep                                                                                                                                                                                                            | Results: Good or improved sleep                                                                                                                                                                                                                                                    |
|-----------------------------------------------------------------------------------------------------------------------------|-----------------------------|---------------------------------|-------------------------------------------|--------------------------------------------------------------------------------------------------------------------------------------------------------------------------------------------------------------------------------------------|------------------------------------------------------------------------------------------------------------------------------------------------------------------------------------------------------------------------------------------------------------------------------------|
| <b>Group 2: Experimental, quasi-Experimental Studies, or observational studies with treatment of pain or sleep. (cont.)</b> |                             |                                 |                                           |                                                                                                                                                                                                                                            |                                                                                                                                                                                                                                                                                    |
| Jaoude et al, 2016 [60]                                                                                                     | n/a                         | Nasal CPAP                      | Pain intensity                            | Non-adherent participants reported pain intensity at baseline* and 12 months (p=0.05)                                                                                                                                                      | Pain intensity did not significantly decrease from baseline to follow-up.                                                                                                                                                                                                          |
| Ruff et al, 2009 [59]                                                                                                       | n/a                         | Taking Prazosin (yes/no)        | Headache pain severity and frequency      | NR                                                                                                                                                                                                                                         | <p>↓ pain severity and frequency (baseline to 9-wk posttreatment)***</p> <p>↓ pain severity and frequency among veterans who completed dosing of prazosin (9-wk posttreatment)***</p> <p>↓ pain severity and frequency among those taking prazosin (6-month follow-up)***</p>      |
| Ruff et al, 2012 [58]                                                                                                       | n/a                         | Daytime Sleepiness              | Headache pain severity and frequency      | <p>Greater daytime sleepiness was associated with:</p> <p>HA pain intensity at 9-wk (Pearson's r = 0.53)***, and 6-mo (Pearson's r = 0.66)***</p> <p>HA pain frequency at 9-wk (Pearson's r = 0.27)*, and 6-mo (Pearson's r = 0.67)***</p> | <p>Differences on daytime sleepiness from endpoint to baseline (†) were associated with:</p> <p>↓ HA pain intensity at 9-wk (Pearson's r = 0.57)***, and 6-mo (Pearson's r = 0.58)***</p> <p>↓ HA pain frequency at 9-wk (Pearson's r = 0.28)*, and 6-mo (Pearson's r = 0.26)*</p> |

Notes. \* = significant (p < 0.05); \*\* = significant (p < 0.01); \*\*\* = significant (p < 0.001); † = Data from some of those columns come directly from the author or subsequent publication. Adjusted odds ratio (AOR), brief pain inventory (BPI), continuous positive airway

pressure (CPAP), exploratory factor analysis (EFA), fiscal year (FY), headache (HA), low back pain (LBP), none reported (NR), obstructive sleep apnea (OSA), osteoarthritis (OA), post-traumatic stress disorder (PTSD), sleep disordered breathing (SBD), standardized mean difference (SMD), traumatic brain injury (TBI).

**Appendix 1 - Literature Search Report**

**Note:** In each database, searches grouping together authorized subject headings and text keywords relating to sleep disorders were merged with searches identifying veterans as research subjects or studies authored by researchers with a Veterans' Administration affiliation. Author affiliation was used as part of the search strategy because VA-affiliated research is likely to use the population of interest whether or not it was specifically identified in the abstract or metadata associated with an article. No date limit or language restriction was applied to any of the searched databases. Publications in foreign languages were translated into English by Google Translate.

**PubMed**

3/18/2020

| # | Search Statement                                                                                                                                                                                                                                                                                                                                                                                                                                                                                                                                                  | Results    | Annotation |
|---|-------------------------------------------------------------------------------------------------------------------------------------------------------------------------------------------------------------------------------------------------------------------------------------------------------------------------------------------------------------------------------------------------------------------------------------------------------------------------------------------------------------------------------------------------------------------|------------|------------|
| 1 | sleep disorder* OR "sleep disorders, intrinsic"[Mesh] OR sleep OR insomnia OR insomni*[tiab] OR "sleep apnea, obstructive"[Mesh] OR sleep apn* OR obstructive sleep apn* OR hypersomnia*[tiab] OR "insomnia severity index"[tiab] OR "Multiple Sleep Latency Tests"[tiab] OR "Epworth sleepiness scale"[tiab] OR "STOP-Bang"[tiab] OR "STOPBANG"[tiab]                                                                                                                                                                                                            | 218100     |            |
| 2 | pain OR "Pain"[mesh] OR chronic pain OR pain tolerance[tiab] OR pain threshold[tiab] OR pain intensity[tiab]                                                                                                                                                                                                                                                                                                                                                                                                                                                      | 818327     |            |
| 3 | "Military Personnel"[Mesh] OR "Veterans"[Mesh] OR "Veterans Health"[Mesh] OR Veteran*[tiab] OR "veteran populations"[tiab] OR veteran[ad] OR veterans[ad] OR VA Med [ad] OR VA medical[ad] OR VA hospital[ad] OR VA Health[ad] OR VA Connecticut[ad] OR "prime center"[All Fields] OR "Department of Veterans Affairs"[tiab] OR "hospitalized veterans"[tiab] OR "VA hospital"[tiab] OR veteran*[Other Term] OR "US Department of Veterans Affairs"[Grant Number] OR "Department of veterans affairs"[ALL FIELDS] OR "veterans health administration"[All fields] | 213969     |            |
| 4 | 1 and 2 and 3                                                                                                                                                                                                                                                                                                                                                                                                                                                                                                                                                     | <b>470</b> |            |

EFFECT OF DISTURBED & DISORDERED SLEEP ON PAIN IN VETERANS

EMBASE

3/18/2020

| # | Search Statement                                                                                                                                                                                                                                                                                             | Results    | Annotation |
|---|--------------------------------------------------------------------------------------------------------------------------------------------------------------------------------------------------------------------------------------------------------------------------------------------------------------|------------|------------|
| 1 | 'sleep' OR 'sleep disorder' OR 'sleep disordered breathing' OR 'sleep apnea':ti,ab OR 'hypersomnia' OR 'insomnia' OR 'insomnia severity index' OR 'somnolence' OR 'epworth sleepiness scale' OR 'sleep latency' OR 'Multiple Sleep Latency Tests' OR 'Epworth sleepiness scale' OR 'STOP-Bang' OR 'STOPBANG' | 405,515    |            |
| 2 | pain OR 'pain threshold' OR 'pain tolerance':ti,ab OR 'chronic pain' OR 'pain intensity'                                                                                                                                                                                                                     | 1,300,777  |            |
| 3 | 'soldier'/exp OR 'veteran'/exp OR 'veterans health':ti,ab OR 'veterans health':ff OR 'veterans administration':ff OR 'veterans hospital':ff OR 'veterans affairs':ff                                                                                                                                         | 163,763    |            |
| 4 | [embase]/lim                                                                                                                                                                                                                                                                                                 | 25,619,526 |            |
| 5 | ([embase]/lim AND [medline]/lim)                                                                                                                                                                                                                                                                             | 16,039,544 |            |
| 6 | 1 and 2 and 3 and 4                                                                                                                                                                                                                                                                                          | 831        |            |
| 7 | 6 not 5                                                                                                                                                                                                                                                                                                      | <b>307</b> |            |

EFFECT OF DISTURBED & DISORDERED SLEEP ON PAIN IN VETERANS

PsycINFO

3/18/2020

| # | Search Statement                                                                                                                                                                                                                                                                                                                                    | Results    | Annotation                                                                                           |
|---|-----------------------------------------------------------------------------------------------------------------------------------------------------------------------------------------------------------------------------------------------------------------------------------------------------------------------------------------------------|------------|------------------------------------------------------------------------------------------------------|
| 1 | SU('sleep' OR 'sleep disorders' OR 'sleep apnea' OR 'hypersomnia' OR 'insomnia') OR AB('sleep' OR 'apnea' OR 'insomnia' OR 'insomnia severity index' OR 'sleep disordered breathing' OR 'somnolence' OR 'epworth sleepiness scale' OR 'sleep latency' OR 'Multiple Sleep Latency Tests' OR 'Epworth sleepiness scale' OR 'STOP-Bang' OR 'STOPBANG') | 81,943     |                                                                                                      |
| 2 | SU(pain OR 'pain thresholds' OR 'pain tolerance' OR 'chronic pain') OR AB(pain OR 'pain intensity')                                                                                                                                                                                                                                                 | 100,256    |                                                                                                      |
| 3 | noft( 'veterans health' OR 'veterans health' OR 'veterans administration' OR 'veterans hospital' OR 'veterans affairs' ) OR (soldier* OR veteran*)                                                                                                                                                                                                  | 53,317     |                                                                                                      |
| 4 | 1 and 2 and 3                                                                                                                                                                                                                                                                                                                                       | 176        | Of which, 161 are journal articles & 7 are dissertation and thesis (8 book references were excluded) |
| 5 | 4 AND stype.exact("Scholarly Journals" OR "Dissertations & Theses")                                                                                                                                                                                                                                                                                 | <b>168</b> | Used this as final sample from PsychINFO                                                             |

EFFECT OF DISTURBED & DISORDERED SLEEP ON PAIN IN VETERANS

CINAHL

3/18/2020

| # | Search Statement                                                                                                                                                                                                                                                                                                                                                                                                                                                     | Results    | Annotation                            |
|---|----------------------------------------------------------------------------------------------------------------------------------------------------------------------------------------------------------------------------------------------------------------------------------------------------------------------------------------------------------------------------------------------------------------------------------------------------------------------|------------|---------------------------------------|
| 1 | ( (MH "Dyssomnias+") OR (MH "Sleep Disorders+") OR (MH "Sleep Apnea Syndromes+") OR (MH "Disorders of Excessive Somnolence+") OR (MH "Insomnia+") ) OR AB ( 'sleep' OR 'sleep disorder' OR 'sleep disordered breathing' OR 'sleep apnea' OR 'hypersomnia' OR 'insomnia' OR 'insomnia severity index' OR 'somnolence' OR 'epworth sleepiness scale' OR 'sleep latency' OR 'Multiple Sleep Latency Tests' OR 'Epworth sleepiness scale' OR 'STOP-Bang' OR 'STOPBANG' ) | 71,996     |                                       |
| 2 | (MH "pain+" OR MH "chronic pain" OR AB('pain threshold' OR 'pain tolerance' OR 'pain intensity' OR pain))                                                                                                                                                                                                                                                                                                                                                            | 318,536    |                                       |
| 3 | (AF ( veteran* OR military OR 'veteran's administration' OR 'VA hospital" ) OR MW veteran* OR MW soldier* OR TX veteran*)                                                                                                                                                                                                                                                                                                                                            | 107,079    |                                       |
| 4 | 1 and 2 and 3                                                                                                                                                                                                                                                                                                                                                                                                                                                        | 323        | Of which, 170 are Medline records     |
| 5 | 4 AND Limiters - Exclude MEDLINE records                                                                                                                                                                                                                                                                                                                                                                                                                             | <b>153</b> | Used this as final sample from CINAHL |



EFFECT OF DISTURBED & DISORDERED SLEEP ON PAIN IN VETERANS

SCOPUS

3/18/2020

| # | Search Statement                                                                                                                                                                         | Results    | Annotation                                                                              |
|---|------------------------------------------------------------------------------------------------------------------------------------------------------------------------------------------|------------|-----------------------------------------------------------------------------------------|
| 1 | TITLE-ABS-KEY ( "sleep" OR "sleep disorder" OR "sleep disordered breathing" OR "sleep apnea" OR "hypersomnia" OR "insomnia" )                                                            | 317,332    |                                                                                         |
| 2 | TITLE-ABS-KEY ( "pain" OR "pain threshold" OR "pain tolerance" OR "chronic pain" OR "pain intensity" )                                                                                   | 1,125,188  |                                                                                         |
| 3 | (TITLE-ABS-KEY ( "soldier" OR "veteran*" ) OR AFFIL ( "veteran*" OR "veterans health" OR "veterans health" OR "veterans administration" OR "veterans hospital" OR "veterans affairs" ) ) | 337,401    |                                                                                         |
| 4 | ( LIMIT-TO ( DOCTYPE , "ar" ) )                                                                                                                                                          |            |                                                                                         |
| 5 | 1 and 2 and 3                                                                                                                                                                            | 885        | Of which, 676 are articles (others are reviews, letters to editor, book chapter, etc.). |
| 6 | 5 and 4                                                                                                                                                                                  | 676        |                                                                                         |
| 7 | AND NOT ( "case study" OR "case report" OR "systematic review")                                                                                                                          |            |                                                                                         |
| 8 | 6 and 7                                                                                                                                                                                  | <b>354</b> | This is the final sample                                                                |
